# Supplementary material for: Photo-responsive thiol–ene networks for the design of switchable polymer patterns
Source: Royal Society of Chemistry journal article supplement (doi:10.1039/c7py00055c), 2017-01-01
Supplement: c7py00055c1.pdf [file c7py00055c1.pdf]

## Photo-responsive thiol-ene networks for the design of switchable polymer patterns

S. Radl,<sup>a</sup> C. Schipfer,<sup>a</sup> S. Kaiser,<sup>a</sup> A. Moser,<sup>b</sup> B. Kaynak,<sup>a</sup> W. Kern<sup>a,c</sup> and S. Schlögl<sup>a†</sup>

<sup>a</sup> Polymer Competence Center Leoben GmbH, Roseggerstraße 12, A-8700 Leoben, Austria.

<sup>b</sup> Chair of Materials Science and Testing of Plastics, Montanuniversität Leoben, Otto Glöckel-Straße 2, A-8700 Leoben, Austria.

<sup>c</sup> Chair of Chemistry of Polymeric Materials, Montanuniversität Leoben, Otto Glöckel-Straße 2, A-8700 Leoben, Austria.

† E-mail: sandra.schloegl@pccl.at

### Results

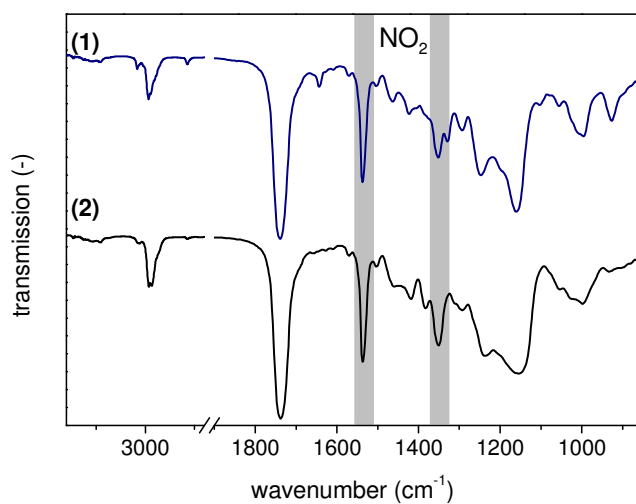

**Figure S1** – FT-IR spectra of TMPMP-2 (1) prior to and (2) after photo-curing with visible light exposure ( $\lambda = 420 - 450$  nm,  $1.45$  J/cm<sup>2</sup>, N<sub>2</sub>).

**Table S1** –  $T_g$  of photocured thiol-ene networks ( $\lambda = 420 - 450$  nm,  $1.45$  J/cm<sup>2</sup>, N<sub>2</sub>).

| sample     | type of thiol            | content of Irgacure 819 (wt.%) | $T_g$ (°C) |
|------------|--------------------------|--------------------------------|------------|
| PETMP-4    | PETMP                    | 4                              | -9         |
| TMPMP-2    | TMPMP                    | 2                              | -12        |
| TMPMP-4    | TMPMP                    | 4                              | -13        |
| HDT-4-0.25 | TMPMP & HDT <sup>1</sup> | 4                              | -17        |
| HDT-4-0.5  | TMPMP & HDT <sup>2</sup> | 4                              | -20        |

<sup>1</sup>3:2 molar ratio of TMPMP and HDT

<sup>2</sup>1:1 molar ratio of TMPMP and HDT

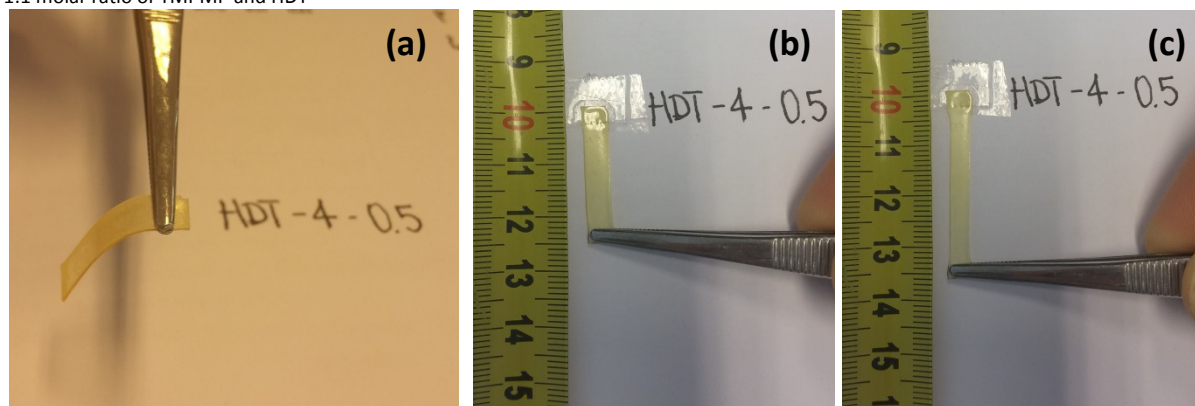

**Figure S2** – (a) Free-standing film of a photocured HDT-4-0.5 resin mixture. (b) and (c) Demonstration of the elasticity and stretchability of a free-standing photo-cured HDT-4-0.5 film.

## Experimental

Differential scanning calorimetry measurements were carried out with a Mettler-Toledo DSC 821e (United States) employing a nitrogen flow of 20 mL min<sup>-1</sup>. The thiol-ene networks were heated from -60 to 100°C with a heating rate of 20°C min<sup>-1</sup>. The glass transition temperature ( $T_g$ ) was obtained from the first heating run and was read as the midpoint in heat capacity.
